# Supplementary material for: Effects of Ownership Text Message Wording and Reminders on Receipt of an Influenza Vaccination: A Randomized Clinical Trial
Source: PubMed Central journal article supplement (PMC8855238; doi:10.1001/jamanetworkopen.2021.43388), 2022-02-17
Supplement: jamanetwopen-e2143388-s003.pdf [file jamanetwopen-e2143388-s003.pdf]

## Data Sharing Statement

Buttenheim. Effects of Ownership Text Message Wording and Reminders on Receipt of an Influenza Vaccination. *JAMA Netw Open*. Published February 17, 2022.

doi:10.1001/jamanetworkopen.2021.43388

### Data

**Data available:** No

### Additional Information

**Explanation for why data not available:** Code and data availability information from the parent study (Milkman et al. 2021 PNAS): The data analyzed in this paper were provided by the Geisinger and Penn Medicine health systems. We do not have legal permission to publicly post individual-level data on vaccinations that we received from our healthcare system partners because our partners consider this to be sensitive health data. Data containing individual-level health information is typically not made publicly available to protect patient privacy (as even if the data are de-identified, it is still possible to re-identify patients from de-identified data). To be as transparent as possible while protecting patient confidentiality, we have posted aggregated data and all of our analysis scripts, done with R and SAS, at <https://bit.ly/2YeummU>. Researchers interested in using individual-level data to replicate our results should contact Behavior Change for Good ([bcfg@wharton.upenn.edu](mailto:bcfg@wharton.upenn.edu)) and must sign the same data non-disclosure agreement to access the data on a protected medical server.
